# Supplementary material
Source: HighWire-hosted journal article supplement (https://bmjopen.bmj.com/content/7/9/e014608)
Supplement: inline-supplementary-material-7 [file inline-supplementary-material-7.pdf]

## Appendix 7: Search and Description of Databases

Medline Search Strategy Example: Tuberculosis

Database: Ovid MEDLINE(R) 1946 to Present with Daily Update

Search Strategy:

- 
- 1 Tuberculosis/ (95731)
  - 2 tuberculo\$.tw. (166967)
  - 3 tb.tw. (28286)
  - 4 ltbi.tw. (1032)
  - 5 or/1-4 (198720)
  - 6 exp Mass Screening/ (106988)
  - 7 (screened or screening?).tw. (413981)
  - 8 Early Diagnosis/ (18853)
  - 9 ((case? or early) adj2 (detected or detection? or diagnos\$ or discover\$)).tw. (148142)
  - 10 exp Population Surveillance/ (55545)
  - 11 (disease? adj2 surveillance).tw. (4019)
  - 12 Contact Tracing/ (3498)
  - 13 contact tracing.tw. (1150)
  - 14 Interferon-gamma Release Tests/ (735)
  - 15 interferon gamma release.tw. (1044)
  - 16 igra.tw. (478)
  - 17 Tuberculin Test/ (12830)
  - 18 tuberculin test\$.tw. (2353)
  - 19 Radiography, Thoracic/ (27994)
  - 20 Mass Chest X-ray/ (1903)
  - 21 (chest\$ adj2 (radiograph\$ or x-ray\$)).tw. (33699)
  - 22 cxr.tw. (1139)
  - 23 cxr.tw. (1139)
  - 24 or/6-23 (704330)
  - 25 meta analysis.mp,pt. (89638)
  - 26 review.pt. (2024759)

- 27 search\$.tw. (250979)
- 28 or/25-27 (2209597)
- 29 animals/ not (humans/ and animals/) (4177583)
- 30 28 not 29 (2053500)
- 31 5 and 24 and 30 (2319)
- 32 31 and (2011\$ or 2012\$ or 2013\$ or 2014\$ or 2015\$ or 2016\$).ed. (694)
- 33 remove duplicates from 32 (683)

Description of the selected electronic databases:

- CINAHL includes more than 3.4 million records and allows access to standards of practice, health care books and book chapters. It includes clinical trials, full-text journals, research instruments, clinical innovations, legal cases and critical paths. It is easy to use and has basic and advanced search features.
- Cochrane CENTRAL compiles comprehensive reports of randomised and quasi-randomised controlled trials. In addition to Embase and Medline, CENTRAL derives its records from other published and unpublished sources. It does not have restriction on language or date of publication.
- Embase is a database specific for biomedical research, systematic reviews and pharmacovigilance. It contains more than 30 million indices and abstracts from conferences, published, peer-reviewed biomedical literature and press publications.
- Epistemonikos is a multilingual database of evidence that systematically searches electronic databases and other sources for systematic reviews and broad syntheses of reviews.
- Medline is a database that has over 20 million references to journal articles in life sciences, focusing on biomedicine. It contains records that are indexed with NLM Medical Subject Headings.
