# Supplementary material
Source: HighWire-hosted journal article supplement (https://bmjopen.bmj.com/content/7/9/e014608)
Supplement: inline-supplementary-material-8 [file inline-supplementary-material-8.pdf]

## Appendix 8: Data Extraction

Appendix 8 Table 1: Data Extraction Table (example based on Vaccine Preventive Disease)

| <u>Included Studies</u>                                                   |      |                                                                               |                     | <u>Summary of Findings Table</u> |                            |                                       |                    |               |
|---------------------------------------------------------------------------|------|-------------------------------------------------------------------------------|---------------------|----------------------------------|----------------------------|---------------------------------------|--------------------|---------------|
| Author                                                                    | Year | Comparison question                                                           | sample size (n)     | Relative effect (95%CI)          | Assumed Risk (control grp) | Corresponding risk (intervention grp) | (n/N) intervention | (n/N) control |
| Zhang (2014) Acellular vaccines for preventing whooping cough in children |      |                                                                               |                     |                                  |                            |                                       |                    |               |
|                                                                           |      | Acellular vs Whole-cell pertussis: Harms                                      |                     |                                  |                            |                                       |                    |               |
|                                                                           |      | 1. Noncompletion due to adverse events: acellular versus whole cell pertussis | 108909 (11 Studies) | RR: 0.23<br>(95%CI: 0.12-0.43)   | n/a                        | n/a                                   | n:248/ 80 060      | n: 338/28 849 |
|                                                                           |      | 2. Death (all causes)                                                         | 122451 (16 Studies) | RR: 0.87<br>(95%CI: 0.62-1.22)   | n/a                        | n/a                                   | n: 81/86 863       | n: 61/35 588  |
|                                                                           |      | 3. Death (infection)                                                          | 108909 (11 Studies) | RR: 0.97<br>(95%CI :0.23-4.16)   | n/a                        | n/a                                   | n: 5/22 154        | n:3/12 344    |

Appendix 8, Table 2: Quality Assessment of Included Reviews using the AMSTAR Tool (example)

| Author     | Title                                                         | SIGN 50/ AMSTAR Score |
|------------|---------------------------------------------------------------|-----------------------|
| Zhang 2014 | Acellular vaccines for preventing whooping cough in children. | 9 out of 11           |

Appendix 8, Table 3: Quality of Evidence for Outcomes

| <u>Included Studies</u>                                                       | <u>Quality of Evidence for Outcomes</u> |               |              |             |                  |                                                                                                                      |
|-------------------------------------------------------------------------------|-----------------------------------------|---------------|--------------|-------------|------------------|----------------------------------------------------------------------------------------------------------------------|
| Author                                                                        | Risk of Bias                            | Inconsistency | Indirectness | Imprecision | Publication Bias | Notes                                                                                                                |
| Zhang (2014) Acellular vaccines for preventing whooping cough in children     |                                         |               |              |             |                  |                                                                                                                      |
| Outcomes                                                                      |                                         |               |              |             |                  |                                                                                                                      |
| 1. Noncompletion due to adverse events: acellular versus whole cell pertussis | Serious (1)                             | Not serious   | Not Serious  | Not Serious | Undetected       | (1) Random sequence generation, allocation concealment is unclear<br><br>Overall quality: Moderate (downgraded by 1) |

Appendix 8, Table 4. Selected outcomes

|                                                                                                         | Importance |
|---------------------------------------------------------------------------------------------------------|------------|
| <b>Tuberculosis</b>                                                                                     |            |
| Hepatotoxicity                                                                                          | Critical   |
| Active TB follow-up                                                                                     | Critical   |
| Drug-resistant TB                                                                                       | Critical   |
| Treatment limiting adverse events                                                                       | Important  |
| Haematological adverse events                                                                           | Important  |
| <b>Hepatitis B</b>                                                                                      |            |
| Hepatocellular carcinoma                                                                                | Critical   |
| HCC mortality                                                                                           | Critical   |
| HBeAg loss                                                                                              | Important  |
| HBV DNA loss                                                                                            | Important  |
| HBsAg loss                                                                                              | Important  |
| Histologic improvement                                                                                  | Important  |
| HBsAg carriage                                                                                          | Important  |
| Liver cancers (except non-hepatocellular carcinoma)                                                     | Important  |
| <b>Hepatitis C</b>                                                                                      |            |
| Mortality due to HCV                                                                                    | Critical   |
| Hepatocellular Carcinoma                                                                                | Critical   |
| Hospitalizations due to HCV                                                                             | Important  |
| Quality of life                                                                                         | Important  |
| Sustained virological response rates (SVR), histological improvements due to treatment                  | Important  |
| Reduced HCV transmission                                                                                | Important  |
| Harms of screening due to over diagnosis/overtreatment                                                  | Important  |
| <b>Measles, mumps, rubella, polio and tetanus, diphtheria, pertussis, haemophilus influenzae type B</b> |            |
| Morbidity                                                                                               | Critical   |
| Mortality                                                                                               | Critical   |
| Vaccine efficacy                                                                                        | Important  |
| Non-completion due to adverse events                                                                    | Important  |

### **Intestinal parasites**

|                                                              |           |
|--------------------------------------------------------------|-----------|
| Overall cure                                                 | Critical  |
| Mortality due to schistosomiasis                             | Critical  |
| Risk of severe strongyloidiasis in immunosuppressed patients | Important |
| % egg reduction                                              | Important |
| Micro haematuria                                             | Important |
| Haemoglobin                                                  | Important |
