# Supplementary material
Source: HighWire-hosted journal article supplement (https://bmjopen.bmj.com/content/7/9/e014608)

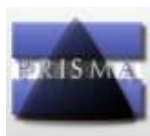

## Appendix 9: PRISMA Flow Diagram for Cost-Effectiveness of TB screening

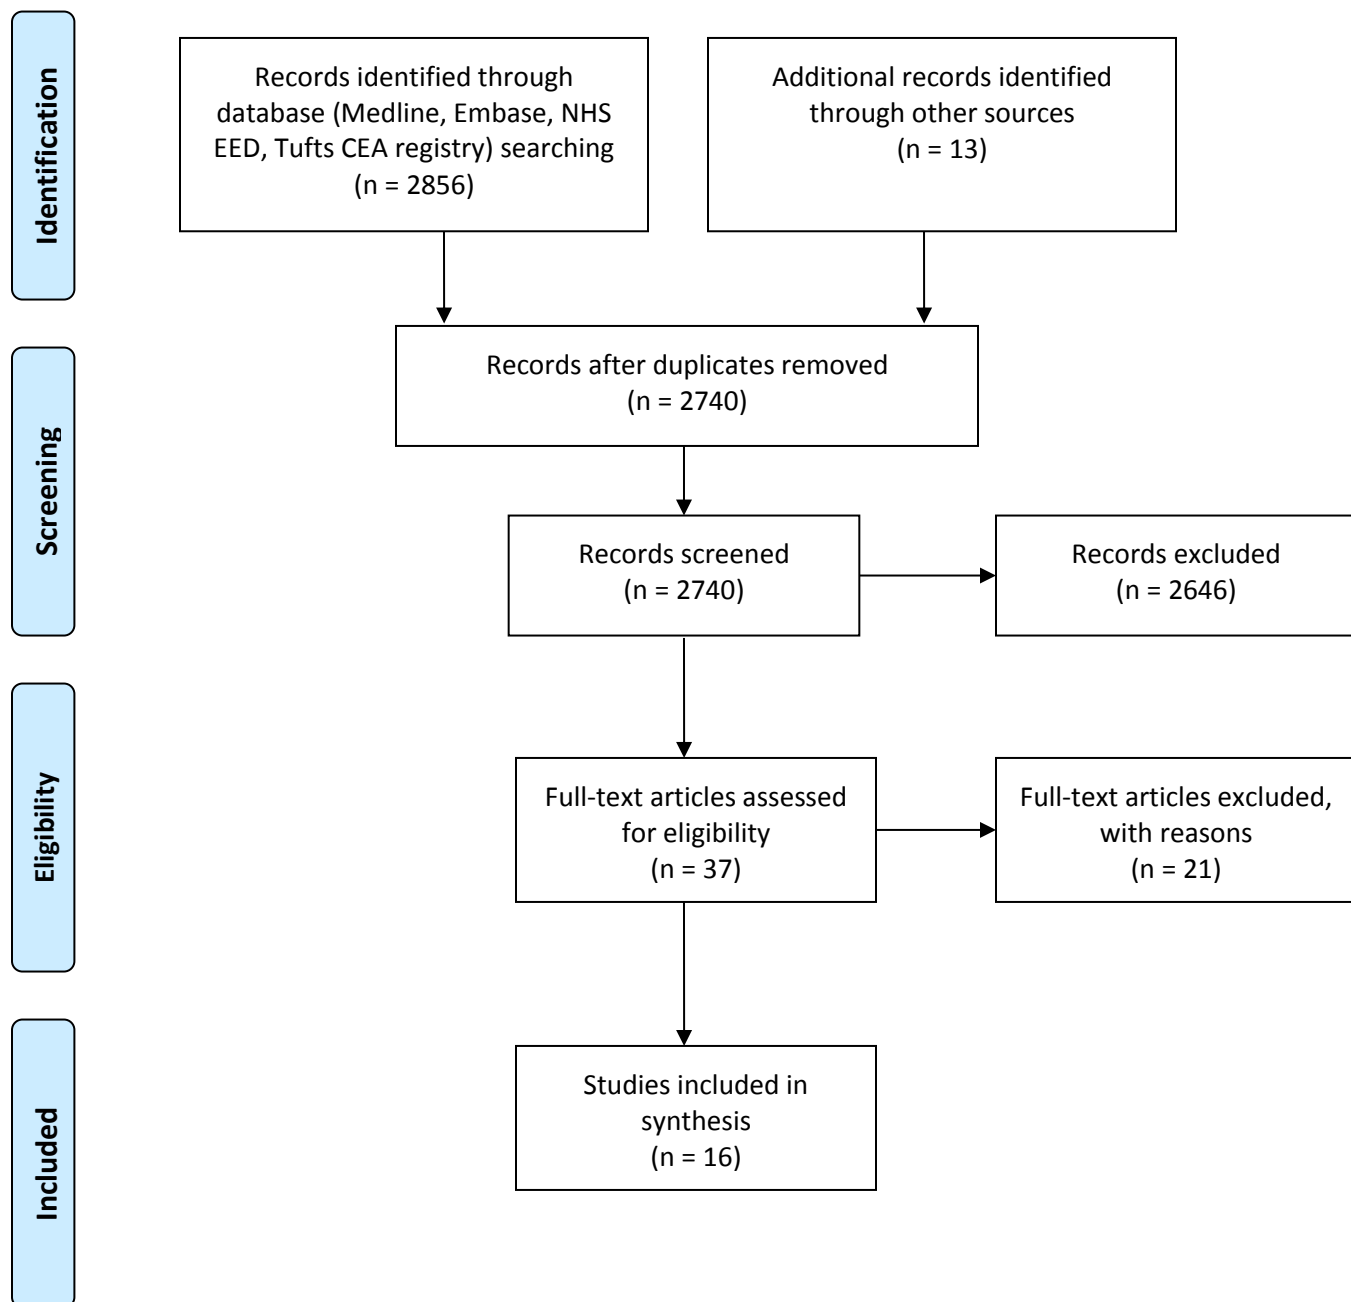

Supplement: inline-supplementary-material-9 [file inline-supplementary-material-9.pdf]
